# Supplementary material for: Efficient DNA-free genome editing of bread wheat using CRISPR/Cas9 ribonucleoprotein complexes
Source: PubMed Central journal article supplement (PMC5253684; doi:10.1038/ncomms14261), 2017-01-18
Supplement: ncomms14261-s1.pdf [file ncomms14261-s1.pdf]

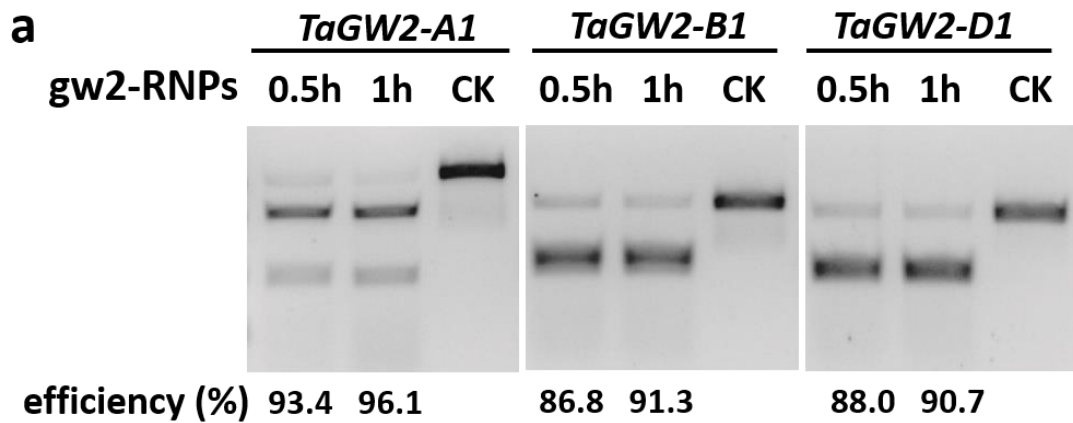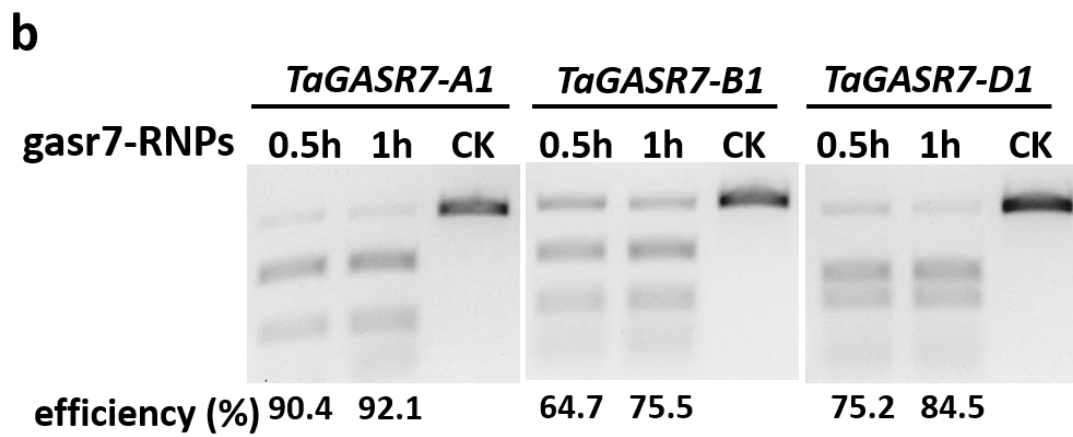

**Supplementary Figure 1.** *In vitro* cleavage of three homoeologs of *TaGW2* (*TaGW2-A1*, *-B1* and *-D1*) and *TaGASR7* (*TaGASR7-A1*, *-B1* and *-D1*) using gw2-RNPs or gasr7-RNPs. CK indicates the incubation without the addition of RNPs.

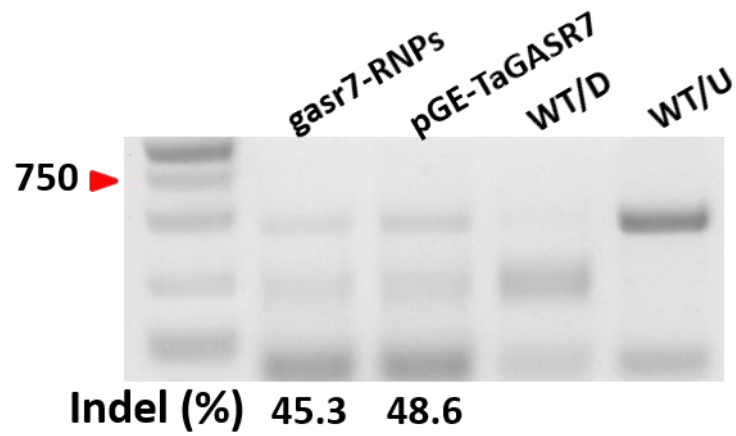

**Supplementary Figure 2.** Mutagenesis frequencies of *TaGASR7* (induced by *gasr7*-RNPs or pGE-*TaGASR7*) in wheat protoplasts analyzed by PCR-RE assay. WT/D and WT/U indicate wild type PCR amplicons with or without restriction enzyme digestion.

**a**

| <i>TaGW2-A1</i> (pGE-TaGW2) |                         | count  | <i>TaGW2-A1</i> (gw2-RNPs) |                         | count |
|-----------------------------|-------------------------|--------|----------------------------|-------------------------|-------|
| WT:                         | CCTCTAGAAATGCCCCATCCTG  |        | WT:                        | CCTCTAGAAATGCCCCATCCTG  |       |
| M1:                         | CCTCTAAGAAATGCCCCATCCTG | +1 996 | M1:                        | CCTCTAAGAAATGCCCCATCCTG | +1 39 |
| M2:                         | CCTCTATGAAATGCCCCATCCTG | +1 367 | M2:                        | CCTCTATGAAATGCCCCATCCTG | +1 25 |
| M3:                         | CCTCGA--AATGCCCCATCCTG  | -2 330 | M3:                        | CCTCT--GAAATGCCCCATCCTG | -1 23 |
| M4:                         | CCTCTA----TGCCCCATCCTG  | -4 284 | M4:                        | CCTCT--AAATGCCCCATCCTG  | -2 22 |
| M5:                         | CCTCTA-----GCCCCATCCTG  | -5 276 | M6:                        | CCTC--GAAATGCCCCATCCTG  | -2 5  |
| M6:                         | CCTCTACGAAATGCCCCATCCTG | +1 141 | M7:                        | CCTCTACGAAATGCCCCATCCTG | +1 4  |
| M7:                         | CCTCT-GAAATGCCCCATCCTG  | -1 129 | M8:                        | CCTCT----ATGCCCCATCCTG  | -4 4  |
| M8:                         | CCTCT---AATGCCCCATCCTG  | -3 120 |                            |                         |       |
| M9:                         | CCTCTA-AAATGCCCCATCCTG  | -1 115 |                            |                         |       |
| M10:                        | CCTCTAGGAAATGCCCCATCCTG | +1 105 |                            |                         |       |

  

**b**

| <i>TaGW2-B1</i> (pGE-TaGW2) |                         | count  | <i>TaGW2-B1</i> (gw2-RNPs) |                         | count    |
|-----------------------------|-------------------------|--------|----------------------------|-------------------------|----------|
| WT:                         | CCTCTAGAAATACCCCATCCTG  |        | WT:                        | CCTCTAGAAATACCCCATCCTG  |          |
| M1:                         | CCTCTAAGAAATACCCCATCCTG | +1 277 | M1:                        | CCTCTAAGAAATACCCCATCCTG | +1 198   |
| M2:                         | CCTCT---AATACCCCATCCTG  | -3 200 | M2:                        | CCTCTATGAAATACCCCATCCTG | +1 67    |
| M3:                         | CCTCTATGAAATACCCCATCCTG | +1 184 | M3:                        | CCTC--GAAATACCCCATCCTG  | -2 43    |
| M4:                         | CCTCT----ATACCCCATCCTG  | -4 168 | M4:                        | CCTCT--AAATACCCCATCCTG  | -2 33    |
| M5:                         | CCTCT--AAATACCCCATCCTG  | -2 127 | M5:                        | CCTCTACGAAATACCCCATCCTG | +1 28    |
| M6:                         | CCTCTA-AAATACCCCATCCTG  | -1 44  | M6:                        | CCTCTA-AAATACCCCATCCTG  | -1 21    |
| M7:                         | CCTCTACGAAATACCCCATCCTG | +1 38  | M7:                        | CCTCT--AAATACCCCATCCTG  | -2 20    |
| M8:                         | CCTCT-GAAATACCCCATCCTG  | -1 37  | M8:                        | CCTCT-GAAATACCCCATCCTG  | -1 16    |
| M9:                         | CCTCTA-----ACCCCATCCTG  | -5 32  | M9:                        | CCTCT---AATACCCCATCCTG  | -3 12    |
| M10:                        | C-----GAAATACCCCATCCTG  | -5 28  | M10:                       | CCTCTA---TTACCCCATCCTG  | -4/+1 12 |

  

**c**

| <i>TaGW2-D1</i> (pGE-TaGW2) |                         | count  | <i>TaGW2-D1</i> (gw2-RNPs) |                         | count  |
|-----------------------------|-------------------------|--------|----------------------------|-------------------------|--------|
| WT:                         | CCTCTAGAAATACCCCATCCTG  |        | WT:                        | CCTCTAGAAATACCCCATCCTG  |        |
| M1:                         | CCTCTAAGAAATACCCCATCCTG | +1 906 | M1:                        | CCTCTAAGAAATACCCCATCCTG | +1 268 |
| M2:                         | CCTCT---AATACCCCATCCTG  | -3 652 | M2:                        | CCTCTATGAAATACCCCATCCTG | +1 155 |
| M3:                         | CCTCTATGAAATACCCCATCCTG | +1 515 | M3:                        | CCTCT---AATACCCCATCCTG  | -3 107 |
| M4:                         | CCTCT----ATACCCCATCCTG  | -4 500 | M4:                        | CCTCT----ATACCCCATCCTG  | -4 32  |
| M5:                         | CCTCTACGAAATACCCCATCCTG | +1 212 | M5:                        | CCTCTACGAAATACCCCATCCTG | +1 26  |
| M6:                         | CCTCTA-----ACCCCATCCTG  | -5 172 | M6:                        | CCTCT--AAATACCCCATCCTG  | -2 26  |
| M7:                         | CCTCTAGGAAATACCCCATCCTG | +1 142 | M7:                        | CCTCTACGAAATACCCCATCCTG | +1 23  |
| M8:                         | CCTCTA-AAATACCCCATCCTG  | -1 102 | M8:                        | CCT---GAAATACCCCATCCTG  | -3 12  |
| M9:                         | CCTCTA----TGCCCCATCCTG  | -4 64  | M9:                        | CCTC--GAAATACCCCATCCTG  | -2 8   |
| M10:                        | CCTCTAG--ATACCCCATCCTG  | -2 50  | M10:                       | CCTCT-GAAATACCCCATCCTG  | -1 7   |

**Supplementary Figure 3.** Ten most frequently occurred mutation types generated by pGE-TaGW2 or gw2-RNPs in immature embryos revealed by deep amplicon sequencing. Hyphens denote deleted nucleotides. The nucleotides inserted are labeled green. The PAM motif (CCT) is shown in red. The number on the right sides indicates the captured reads of the mutation type.

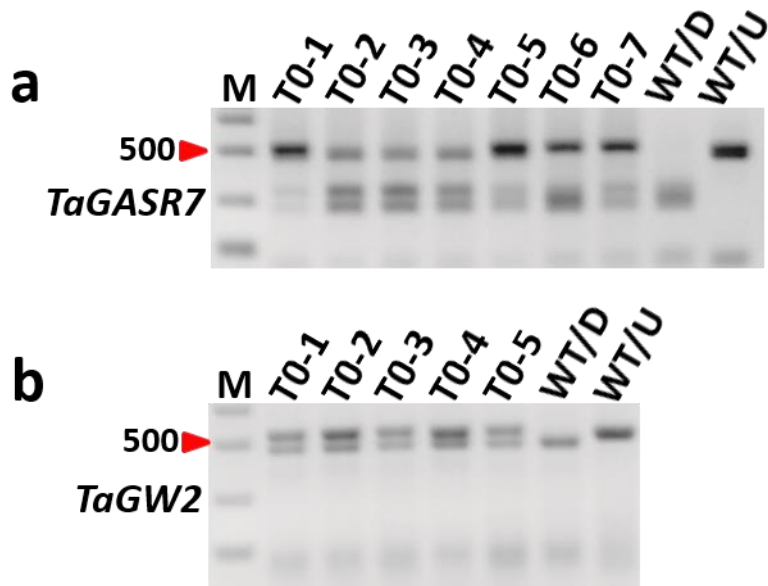

**Supplementary Figure 4.** PCR-RE assay analysis for *gasr7*-RNPs (a) and *gw2*-RNPs (b) induced mutants in hexaploid wheat line YZ814. Lanes T0-1 to T0-7 show the PCR products of the mutants after enzyme digestion. Lanes labeled by WT/D and WT/U are the PCR products amplified from wild type (WT) plants with and without enzyme digestion, respectively.

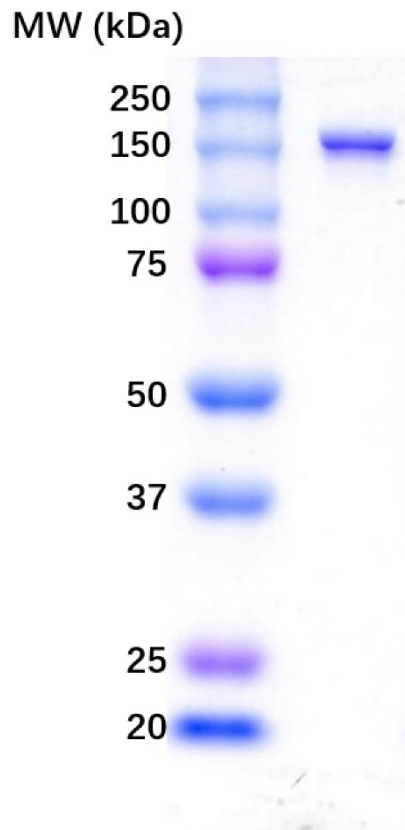

**Supplementary Figure 5.** SDS-PAGE image of purified Cas9 protein. 1  $\mu$ l Cas9 protein was detected by SDS-PAGE electrophoresis system using 10% separating gel.

**Supplementary Table 1.** sgRNA target loci and sequences.

| Gene name      | Target site (5'-3')            | Oligo-F (5'-3')             | Oligo-R (5'-3')             | Detection method                   |
|----------------|--------------------------------|-----------------------------|-----------------------------|------------------------------------|
| <i>TaGW2</i>   | <u>CCT</u> CTAGAAATACCCCATCCTG | CTTGCAGGATGGGGTA<br>TTTCTAG | AAACCTAGAAATACCC<br>CATCCTG | Deep sequencing and PCR-RE<br>XbaI |
| <i>TaGASR7</i> | <u>CCG</u> CCGGGCACCTACGGCAAC  | CTTGGTTGCCGTAGGT<br>GCCCGG  | AAACCCGGGCACCTAC<br>GGCAAC  | Deep sequencing and PCR-RE<br>BclI |

**Supplementary Table 2.** Mutagenesis frequencies of *TaGW2-A1*, *-B1*, *-D1* (induced by gw2-RNPs or pGE-TaGW2) and *TaGASR7* (induced by gasr7-RNPs or pGE-TaGASR7) in the embryos revealed by deep amplicon sequencing.

| Target gene     | Reagents   | Total reads | Mutant reads | Mutagenesis frequency (%) |
|-----------------|------------|-------------|--------------|---------------------------|
| <i>TaGW2-A1</i> | pGE-TaGW2  | 425527      | 3245         | 0.76                      |
|                 | gw2-RNPs   | 390295      | 122          | 0.03                      |
|                 | Control    | 408883      | 10           | 0                         |
| <i>TaGW2-B1</i> | pGE-TaGW2  | 133533      | 1320         | 0.99                      |
|                 | gw2-RNPs   | 296538      | 541          | 0.18                      |
|                 | Control    | 220458      | 21           | 0.01                      |
| <i>TaGW2-D1</i> | pGE-TaGW2  | 433865      | 4333         | 1.00                      |
|                 | gw2-RNPs   | 323010      | 677          | 0.21                      |
|                 | Control    | 213139      | 19           | 0.01                      |
| <i>TaGASR7</i>  | gasr7-RNPs | 80240       | 448          | 0.56                      |
|                 | Control    | 17632       | 0            | 0                         |

**Supplementary Table 3. PCR primers used in this study.**

| Primer name                  | Primer sequence (5'-3')                                            | Application                                                                                                        |
|------------------------------|--------------------------------------------------------------------|--------------------------------------------------------------------------------------------------------------------|
| GW2-F<br>GW2-R               | ATGCCAACCCCTTGCGTGTGCGT<br>TCCTGCTTGTGGGAGCTTTATG                  | Amplifying the <i>TaGW2</i> target site                                                                            |
| GW2-A1-F                     | CTGCCATTACTTTGTATTTTGGTAATA                                        | Amplifying the <i>TaGW2-A1</i> target site and 1 <sup>st</sup> PCR for deep sequencing                             |
| GW2-B1-F                     | G TTCAGATGGCAATCTAAAAGTT                                           | Amplifying the <i>TaGW2-B1</i> target site and 1 <sup>st</sup> PCR for deep sequencing                             |
| GW2-D1-F                     | GCATGTACTTTGATTGTTTGCCTGA                                          | Amplifying the <i>TaGW2-D1</i> target site and 1 <sup>st</sup> PCR for deep sequencing                             |
| GW2-A1/B1/D1-R               | TCCTTCCTCTCTTACCACTTCCC                                            | Amplifying the <i>TaGW2-A1</i> , <i>-B1</i> and <i>-D1</i> target site and 1 <sup>st</sup> PCR for deep sequencing |
| T7-GW2-F<br>sgRNA-PCR-R      | TAATACGACTCACTATAGGCAGGATGGGGTATT<br>TCTAG<br>GCACCGACTCGGTGCCACTT | Amplifying the T7-GW2-sgRNA                                                                                        |
| T7-GASR7-F<br>sgRNA-PCR-R    | TAATACGACTCACTATAGGGTTGCCGTAGGTGC<br>CCGG<br>GCACCGACTCGGTGCCACTT  | Amplifying the T7-GASR7-sgRNA                                                                                      |
| GASR7-F<br>GASR7-R           | GGAGGTGATGGGAGGTGGGGG<br>CTGGGAGGGCAATTCACATGCCA                   | Amplifying the <i>TaGASR7</i> target site and 1 <sup>st</sup> PCR for deep sequencing                              |
| GASR7-A1/B1/D1-F             | CCTTCATCCTTCAGCCATGCAT                                             | Amplifying the <i>TaGASR7-A1</i> , <i>-B1</i> and <i>-D1</i> target site                                           |
| GASR7-A1-R                   | CCACTAAATGCCTATCACATACG                                            | Amplifying the <i>TaGASR7-A1</i> target site                                                                       |
| GASR7-B1-R                   | AGGGCAATTCACATGCCACTGAT                                            | Amplifying the <i>TaGASR7-B1</i> target site                                                                       |
| GASR7-D1-R                   | CCTCCATTTTTCCACATCTTAGTCC                                          | Amplifying the <i>TaGASR7-D1</i> target site                                                                       |
| BA1-GW2-AF<br>BA2-GW2-AR     | CGATGTTGCCTTTTGGCAACCAACG<br>TGACCATCCATGCTTGATGGCTGGTG            | 2 <sup>nd</sup> PCR for deep sequencing of <i>TaGW2-A1</i> of pGE-TaGW2                                            |
| BA3-GW2-BF<br>BA4-GW2-BR     | ACAGTGTGCCTTTTGGCAACCAACG<br>GCCAATTCATGCTTGATGGCTGGTG             | 2 <sup>nd</sup> PCR for deep sequencing of <i>TaGW2-B1</i> of pGE-TaGW2                                            |
| BA5-GW2-DF<br>BA6-GW2-DR     | CAGATCTGCCTTTTGGCAACCAACG<br>CTTGATCCATGCTTGCTGGCTGGTG             | 2 <sup>nd</sup> PCR for deep sequencing of <i>TaGW2-D1</i> of pGE-TaGW2                                            |
| BA13-GW2-AF<br>BA14-GW2-AR   | AGTCAATGCCTTTTGGCAACCAACG<br>AGTTCCCTCCATGCTTGATGGCTGGTG           | 2 <sup>nd</sup> PCR for deep sequencing of <i>TaGW2-A1</i> of gw2-RNPs                                             |
| BA15-GW2-BF<br>BA16-GW2-BR   | ATGTCATGCCTTTTGGCAACCAACG<br>CCGTCCCTCCATGCTTGATGGCTGGTG           | 2 <sup>nd</sup> PCR for deep sequencing of <i>TaGW2-B1</i> of gw2-RNPs                                             |
| BA17-GW2-DF<br>BA18-GW2-DR   | GTAGAGTGCCTTTTGGCAACCAACG<br>GTCCGCTCCATGCTTGCTGGCTGGTG            | 2 <sup>nd</sup> PCR for deep sequencing of <i>TaGW2-D1</i> of gw2-RNPs                                             |
| BA43-GW2-AF<br>BA44-GW2-AR   | TACAGCTGCCTTTTGGCAACCAACG<br>TATAATTCCATGCTTGATGGCTGGTG            | 2 <sup>nd</sup> PCR for deep sequencing of <i>TaGW2-A1</i> of WT                                                   |
| BA45-GW2-BF<br>BA46-GW2-BR   | TCATTCTGCCTTTTGGCAACCAACG<br>TCCCGATCCATGCTTGATGGCTGGTG            | 2 <sup>nd</sup> PCR for deep sequencing of <i>TaGW2-B1</i> of WT                                                   |
| BA47-GW2-DF<br>BA48-GW2-DR   | TCGAAGTGCCTTTTGGCAACCAACG<br>TCGGCATCCATGCTTGCTGGCTGGTG            | 2 <sup>nd</sup> PCR for deep sequencing of <i>TaGW2-D1</i> of WT                                                   |
| BA41-GASR7-F<br>BA42-GASR7-R | GCGCTAGAAGGCGTGCCTGACCTACT<br>TAATCGCAAGAATCTAGGGGCACTTGG          | 2 <sup>nd</sup> PCR for deep sequencing of <i>TaGASR7</i> of WT                                                    |
| BA43-GASR7-F<br>BA44-GASR7-R | TACAGCGAAGGCGTGCCTGACCTACT<br>TATAATCAAGAATCTAGGGGCACTTGG          | 2 <sup>nd</sup> PCR for deep sequencing of <i>TaGASR7</i> of <i>gasr7</i> -RNPs                                    |



**Supplementary Table 4.** Genotypes of another 16 *tagw2* mutant plants induced by *gw2*-RNPs.

| Plant ID | Genotype of <i>TaGW2-A1</i> | Genotype of <i>TaGW2-B1</i> | Genotype of <i>TaGW2-D1</i> |
|----------|-----------------------------|-----------------------------|-----------------------------|
| T0-13    | AA                          | BB                          | Dd (-3 bp)                  |
| T0-14    | AA                          | Bb (+1 bp)                  | dd (-9 bp)                  |
| T0-15    | AA                          | Bb (+1 bp)                  | dd (-9 bp)                  |
| T0-16    | AA                          | Bb (-1 bp)                  | Dd (+1 bp)                  |
| T0-17    | AA                          | Bb (-1 bp)                  | Dd (+1 bp)                  |
| T0-18    | AA                          | BB                          | Dd (-16 bp)                 |
| T0-19    | AA                          | Bb (-6/+1 bp)               | Dd (-6 bp)                  |
| T0-20    | AA                          | Bb (-6/+1 bp)               | Dd (-6 bp)                  |
| T0-21    | AA                          | Bb (-6/+1 bp)               | Dd (-6 bp)                  |
| T0-22    | AA                          | BB                          | Dd (+1 bp)                  |
| T0-23    | AA                          | BB                          | Dd (+1 bp)                  |
| T0-24    | AA                          | BB                          | Dd (+1 bp)                  |
| T0-25    | AA                          | BB                          | Dd (-3 bp)                  |
| T0-26    | AA                          | BB                          | Dd (-3 bp)                  |
| T0-27    | AA                          | BB                          | Dd (-6 bp)                  |
| T0-28    | AA                          | BB                          | Dd (-6 bp)                  |

**Supplementary Table 5.** Potential off-target sites analyzed for *TaGW2*.

| Site name | Sequence                       | No. of mismatches | Mutagenesis frequency | Detection Method  |
|-----------|--------------------------------|-------------------|-----------------------|-------------------|
| On-target | <u>CCT</u> CTAGAAATACCCCATCCTG |                   |                       |                   |
| OT1       | gAGGATGGGGTATTTaTAGTGG         | 2                 | 0                     | Sanger Sequencing |
| OT2       | tAaGATGGGtTATTTCTAGAGG         | 3                 | 0                     | PCR-RE XbaI       |
| OT3       | gAGGATGGGaTtTTTCTAGAGG         | 3                 | 0                     | PCR-RE XbaI       |
| OT4       | gAGGAgGGGGTATTTaTAGTGG         | 3                 | 0                     | Sanger Sequencing |
| OT5       | tAaGATGGGtTATTTCTAGAGG         | 3                 | 0                     | Sanger Sequencing |
| OT6       | CAGcATcGGGTATTTCTcGAGG         | 3                 | 0                     | Sanger Sequencing |
| OT7       | CtGGAcGGGGTATTTgTAGTGG         | 3                 | 0                     | Sanger Sequencing |
| OT8       | CAGGgTtGGGTcTTTCTAGTGG         | 3                 | 0                     | Sanger Sequencing |
| OT9       | gAGGcTGGGGTATTTaTAGTGG         | 3                 | 0                     | Sanger Sequencing |
| OT10      | CACgATGGcGcATTTCTAGTGG         | 3                 | 0                     | Sanger Sequencing |
| OT11      | aAGaATGGGccATTTCTAGAGG         | 4                 | 0                     | PCR-RE XbaI       |
| OT12      | aAGaATGGGtcATTTCTAGAGG         | 4                 | 0                     | PCR-RE XbaI       |
| OT13      | CgGcATGGaGTATaTCTAGAGG         | 4                 | 0                     | PCR-RE XbaI       |
| OT14      | CcGGAgGGaGTATgTCTAGAGG         | 4                 | 0                     | PCR-RE XbaI       |
| OT15      | ttGGAaGGGGgATTTCTAGAGG         | 4                 | 0                     | PCR-RE XbaI       |
| OT16      | gAGGAcaGaGgATTTCTAGAGG         | 5                 | 0                     | PCR-RE XbaI       |
| OT17      | CttGtgtGGGTATTTCTAGTGG         | 5                 | 0                     | Sanger Sequencing |
| OT18      | CAtGgTaGaGTtTTTCTAGTGG         | 5                 | 0                     | Sanger Sequencing |
| OT18      | tAaGATtGGGTATTgCTaTAGG         | 5                 | 0                     | Sanger Sequencing |
| OT20      | gAGcAgGcGGTATTTaTAGTGG         | 5                 | 0                     | Sanger Sequencing |
